# Supplementary material for: Computational Insights and In Silico Characterization of a Novel Mini-Lipoxygenase from Nostoc Sphaeroides and Its Application in the Quality Improvement of Steamed Bread
Source: MDPI journal article supplement (doi:10.3390/ijms24097941), 2023-04-27
Supplement: s1 [file s1]

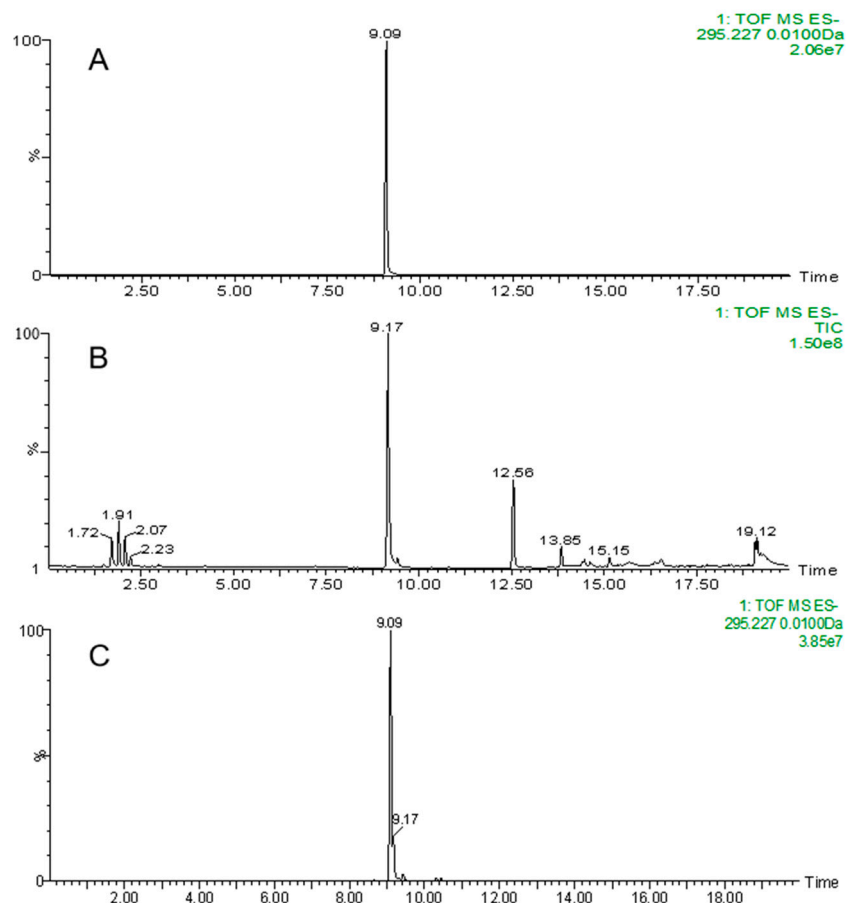

**Figure S1.** Identification of the product obtained from LA by the reaction of NsLOX. (A) LC-MS profile of the standard 9-HODE. (B) LC-MS profile of the standard 13-HODE. (C) LC-MS profile of the product.
